# Supplementary material for: High isoelectric point sub-proteome analysis of Acinetobacter radioresistens S13 reveals envelope stress responses induced by aromatic compounds
Source: Royal Society of Chemistry journal article supplement (doi:10.1039/c0mb00112k), 2010-10-18
Supplement: c0mb00112k_1.pdf [file c0mb00112k_1.pdf]

**TABLE 1**

Identification of proteins in *A. radioresistens* S13, grown on acetate, benzoate and phenol.<sup>(a)</sup> corresponding to Fig. 2, <sup>b</sup> theoretical pI; <sup>c</sup> theoretical mass). Results of *De Novo* sequencing are underlined, while those obtained by peptide mass fingerprinting (PMF) are indicated in **bold**

| Spot n. <sup>a</sup> | Location         | Annotation UniprotKB                                            | UniprotKB code | Sequence coverage | score | Identified peptides ( <u>De Novo sequencing</u> /PMF)                                                                                                                                                                                                                                                                              | pI <sup>b</sup> | Mass (kDa) <sup>c</sup> |
|----------------------|------------------|-----------------------------------------------------------------|----------------|-------------------|-------|------------------------------------------------------------------------------------------------------------------------------------------------------------------------------------------------------------------------------------------------------------------------------------------------------------------------------------|-----------------|-------------------------|
| 4s                   | Soluble proteome | Carboxy-terminal Protease for Penicilling-binding protein (Tsp) | Q6FEN          | 22%               | 77.0  | <b>R.QLATLVDR.Q</b><br><b>R.QHYLNMR.L</b><br><b>K.AFYEVLGEL.K</b><br><b>K.TVAEQQDYWR.K</b><br><b>K.EEDLAKQK.A</b><br><b>R.QTTLQLEGIGVSIRPER.G</b><br><b>K.IETIVEGGPASK.S</b><br><b>R.RAGTEYR.S</b><br><b>K.NVEGIHDLR.N</b><br><b>R.NNPGGSLEEVAR.M</b><br><b>K.LVDIYDEEFGER.K</b><br><b>K.WDTIPTAPFK.R</b><br><b>R.EGSIQPYVTK.L</b> | 8.11            | 80.36                   |

|    |                  |                          |        |     |      |                                                                                                                                                                                                                                                                                    |      |       |
|----|------------------|--------------------------|--------|-----|------|------------------------------------------------------------------------------------------------------------------------------------------------------------------------------------------------------------------------------------------------------------------------------------|------|-------|
| 5s | Soluble proteome | 30S Ribosomal protein S2 | Q6FA53 | 55% | 68.0 | <b>M.ADYNVSMR.D</b><br><b>K.MRQYIFGAR.N</b><br><b>R.QYIFGAR.N</b><br><b>K.IHIINLEHTVPALNDALNFANQLASK.K</b><br><b>R.AGQPYVDH.W</b><br><b>R.WLGGMLTNWK.T</b><br><b>K.NMGGLPDALFVIDVDHEAIAIK.E</b><br><b>K.NLGIPVIGIVDTNSNPDNVDYVIPGNDDAIR.A</b><br><b>K.EYAQSQANAQAKGEEAPAASEA.-</b> | 9.00 | 27.52 |
| 6s | Soluble proteome | Glutaminase/Asparaginase | Q6FAL6 | 21% | 24.0 | <b>K.ELLTAR.K</b><br><b>R.VPQGFVLR.N</b><br><b>K..LLTALALTQTR.D</b><br><b>K.NIVPTLTELQQR.G</b><br><b>K.RFNNTSEFNIEIK.G</b><br><b>R.NAEQPDDKYNWVVAHDLNPQK.A</b>                                                                                                                     | 8.53 | 37.92 |

|    |                  |                                              |        |     |       |                                                                                                                                                                                                                                                                          |      |       |
|----|------------------|----------------------------------------------|--------|-----|-------|--------------------------------------------------------------------------------------------------------------------------------------------------------------------------------------------------------------------------------------------------------------------------|------|-------|
| 7s | Soluble proteome | Soluble Pyridine Nucleotide Transhydrogenase | Q6FA50 | 23% | 124.0 | <b>R.EQGVLIR.H</b><br><b>K.IDIYHGR.A</b><br><b>R.QTVSSIIR.Y</b><br><b>R.VAALNGLNR.L</b><br><b>K.ADAILWCNGR.S</b><br><b>K.IPYEVGQASFR.H</b><br><b>K.VIQQQVDTHSR.F</b><br><b>K.LLSYLDDEIADALSYHLR.E</b><br><b>K.YFIETTFNYPTMAEAYR.V</b><br><b>K.TEQELTEEKIPYEVGQASFR.H</b> | 6.63 | 52.55 |
| 8s | Soluble proteome | Pseudouridine ( $\psi$ ) Synthase (TruB)     | Q6FDU7 | 30% | 66.0  | <b>R.YMEEVIAAGR.V</b><br><b>R.IEPGDEL.R.I</b><br><b>R.KVQFQIEDEIR.R</b><br><b>R.VLIYYKPEGEICSR.N</b><br><b>R.LDINSTGLLLFTNDGELANR.L</b><br><b>R.LMHPSNEIER.E</b><br><b>R.VMGEVTPQIR.Q</b><br><b>R.RLFESQGLK.V</b>                                                        | 9.79 | 35.98 |
| 9s | Soluble proteome | ATP Synthase Gamma Chain                     | Q6FFK1 | 23% | 133.0 | <b>R.YMVERPVK.R</b><br><b>R.VGYIIVSSDR.G</b><br><b>K.VVQHVQQQR.E</b><br><b>R.RAQERMAQGRPYAENMHR.V</b><br><b>R.YIESMVYQGVINIACEQSAR.M</b>                                                                                                                                 | 9.23 | 32.05 |

|     |                  |                                                                         |        |       |      |                                                                                       |      |       |
|-----|------------------|-------------------------------------------------------------------------|--------|-------|------|---------------------------------------------------------------------------------------|------|-------|
| 10s | Soluble proteome | Tolerance to colicins E2, E, A, and K, required for OM integrity (TolB) | B0VCX0 | 2%    | 61.0 | <u>R.MNLPSEQGEVR.E</u>                                                                | 8.81 | 46.40 |
| 14s | Soluble proteome | Putative uncharacterized protein (ACIAD2482)                            | Q6F9L4 | 3%    | 61.0 | <u>K.ANDNQYLGQAALR.D</u>                                                              | 6.20 | 39.51 |
| 15s | Soluble proteome | FKBP-type 22KD peptidyl-prolyl cis-trans isomerase (Ppiase)             | Q6FFV0 | 11%   | 140  | <u>K.DQLGYSYGYVMGR.T</u><br><u>R.LLDGTVFDSSIAR.N</u>                                  | 9.05 | 24.92 |
| 16s | Soluble proteome | Phosphatidylserine decarboxylase                                        | Q6F6W3 | 5%    | 40.0 | <u>R.MVCLFDTELGR.M</u>                                                                | 7.81 | 36.41 |
| 18s | Soluble proteome | Transcription elongation factor NusA                                    | Q6FF41 | 2.4%  | 30.0 | <u>K.LDMMLEEEYR.A + 2 Oxidation (M)</u>                                               | 4.51 | 55.30 |
| 20s | Soluble proteome | 50S ribosomal protein L3                                                | Q6F7R2 | 13.6% | 279  | <u>R.VTEAELEGR.E</u><br><u>R.TQDATHGNSVSHR.V</u><br><u>R.VTVQGLEIVSIDAER.S</u>        | 9.88 | 22.50 |
| 21s | Soluble proteome | tRNA 2-thiocytidine biosynthesis protein ttcA                           | Q6F8Q3 | 14%   | 168  | <u>K.QPGFPEDVLPR.Y</u><br><u>R.GSLYGFAQEIGATK.V</u><br><u>R.LHSIFGALQNVSPSQLADR.D</u> | 7.60 | 34.98 |
| 27s | Soluble proteome | Sulfate ABC transporter periplasmic substrate-binding protein (CysP)    | Q6F9B2 | 3.9%  | 60.0 | <u>K.DFLNVSYPTR.E</u>                                                                 | 9.53 | 36.88 |

|     |                   |                                                            |        |     |     |                                                                                                                                                                                                                                    |      |       |
|-----|-------------------|------------------------------------------------------------|--------|-----|-----|------------------------------------------------------------------------------------------------------------------------------------------------------------------------------------------------------------------------------------|------|-------|
| 1m  | Membrane proteome | Transcription termination factor Rho                       | Q6F876 | 26% | 288 | <b>K.IAEFMGLEGMAR.N</b><br><b>R.SAAGSYLAGPDDIYVSPSQIR.R</b><br><b>R.TGDTITGTIRPPK.E</b><br><b>K.VNQINYDTPENSR.N</b><br><b>R.GEVVASTFDESPAR.H</b><br><b>K.DVVILLDSITR.L</b><br><b>K.MDDVIYEEFK.G</b><br><b>K.LLHPMDELAAMEFLDR.M</b> | 6.60 | 47.51 |
| 2m  | Membrane proteome | Putative serine protease (DegP)                            | Q6F9B7 | 5%  | 113 | <b>R.SYLGVMLQDIDR.N</b><br><b>K.MTQEELLQQQVPEILR.R</b>                                                                                                                                                                             | 8.91 | 50.18 |
| 5m  | Membrane proteome | D-ala-D-ala-carboxypeptidase; penicillin-binding protein 5 | A3M7F9 | 11% | 135 | <b>K.EFTFNGIK.Q</b><br><b>K.YYPIYSEK.E</b><br><b>K.GELTENEQVR.M</b><br><b>R.NALLYTDPSVDGLK.T</b>                                                                                                                                   | 7.02 | 38.1  |
| 7m  | Membrane proteome | Sulfate adenylyl transferase (CysD)                        | Q6FDA0 | 21% | 155 | <b>K.YQFDAAFGGAR.R</b><br><b>K.QLEAESIHIRE.E</b><br><b>K.LPFPLLHVDTGWK.F</b>                                                                                                                                                       | 7.96 | 18.5  |
| 9m  | Membrane proteome | Protein involved in catabolism of external DNA             | B2HZ48 | 8%  | 56  | <b>K.SGEFLTGIHR.L</b><br><b>R.GLV MIDPPYELER.K</b>                                                                                                                                                                                 | 8.62 | 33.03 |
| 11m | Membrane proteome | Outer-membrane lipoproteins carrier protein (LolA)         | Q6F8G3 | 9%  | 99  | <b>K.TVWIYD PDLQQAVR.Q</b><br><b>K.TYYTLYPK.N</b>                                                                                                                                                                                  | 9.68 | 25.13 |

|     |                   |                                                       |        |      |     |                                                                                                      |      |       |
|-----|-------------------|-------------------------------------------------------|--------|------|-----|------------------------------------------------------------------------------------------------------|------|-------|
| 4m  | Membrane proteome | Putative peptide import ATP-binding protein BMEII0863 | Q8YBN6 | 2.7% | 61  | <u>HATVPPLASV</u>                                                                                    | 9.36 | 36.71 |
| 10m | Membrane proteome | Xilose isomerase                                      | Q64U20 | 2%   | 67  | <u>EADSIETYEA</u>                                                                                    | 5.07 | 49.02 |
| 12m | Membrane proteome | Phospholipid-binding protein with LysM domain         | Q6FDT6 | 14%  | 164 | <u>NADDIYPGKVL</u><br><u>RHVAKVDD</u>                                                                | 5.80 | 44.68 |
| 13m | Membrane proteome | Putative uncharacterized protein (peptide signal)     | Q6FAQ8 | 17%  | 298 | <u>KPVVIDAVINK</u><br><u>SDFGIASYVPNV</u><br><u>IGFNATTSE</u><br><u>NSSVDVTI</u><br><u>ITTEASVAK</u> | 9.35 | 20.8  |
| 14m | Membrane proteome | Mobilization protein                                  | Q6J2C2 | 2%   | 69  | <u>TVIAHVEESH</u>                                                                                    | 8.27 | 53.77 |
