# Supplementary material for: High isoelectric point sub-proteome analysis of Acinetobacter radioresistens S13 reveals envelope stress responses induced by aromatic compounds
Source: Royal Society of Chemistry journal article supplement (doi:10.1039/c0mb00112k), 2010-10-18
Supplement: c0mb00112k_2.pdf [file c0mb00112k_2.pdf]

Spots intensity of *Acinetobacter radioresistens* S13 grown on Acetate, Benzoate and Phenol.

(<sup>a</sup> corresponding to Fig. 2, <sup>b</sup> mean ± Standard error of the mean)

| Spot n. <sup>a</sup> | Annotation UniprotKB                                                    | Spot level in A <sup>b</sup> | Spot level in B <sup>b</sup> | Spot level in P <sup>b</sup> |
|----------------------|-------------------------------------------------------------------------|------------------------------|------------------------------|------------------------------|
| 4s                   | Carboxy-terminal Protease for Penicilling-binding protein (Tsp)         | 0±0                          | 330,16±9,20                  | 486,20±46,73                 |
| 5s                   | 30S Ribosomal protein S2                                                | 77,13±33,4                   | 1291,40±59,04                | 1405,13±189,68               |
| 6s                   | Glutaminase/Asparaginase                                                | 0±0                          | 486,20±6,85                  | 0±0                          |
| 7s                   | Soluble Pyridine Nucleotide Transhydrogenase                            | 14,83±6,42                   | 198,82±20,69                 | 376,98±40,44                 |
| 8s                   | Pseudouridine (ψ) Synthase (TruB)                                       | 0±0                          | 90,66±15,18                  | 120,60±18,27                 |
| 9s                   | ATP Synthase Gamma Chain                                                | 0±0                          | 226,01±22,2                  | 258,67±38,49                 |
| 10s                  | Tolerance to colicins E2, E, A, and K, required for OM integrity (TolB) | 0±0                          | 334,57±10,14                 | 422,5±10,06                  |
| 14s                  | Putative uncharacterized protein (ACIAD2482)                            | 0±0                          | 39,48±9,51                   | 123,71±6,29                  |
| 15s                  | FKBP-type 22KD peptidyl-prolyl cis-trans isomerase (Ppiase)             | 0±0                          | 57,80±2,93                   | 106,56±11,48                 |
| 16s                  | Phosphatidylserine decarboxylase                                        | 0±0                          | 22,70±0,97                   | 98,63±14,30                  |
| 18s                  | Transcription elongation factor NusA                                    | 0±0                          | 28,13±6,40                   | 91,18±15,53                  |
| 20s                  | 50S ribosomal protein L3                                                | 0±0                          | 0±0                          | 78,90±8,17                   |
| 21s                  | tRNA 2-thiocytidine biosynthesis protein ttcA                           | 0±0                          | 0±0                          | 83,64±16,04                  |
| 27s                  | Sulfate ABC transporter periplasmic substrate-binding protein (CysP)    | 0±0                          | 1,19±0,52                    | 37,78±4,99                   |
| 1m                   | Transcription termination factor Rho                                    | 34,79±5,09                   | 53,484±11,63                 | 113,6133±10,10               |
| 2m                   | Putative serine protease (DegP)                                         | 0±0                          | 0±0                          | 98,81±2,13                   |
| 5m                   | D-ala-D-ala-carboxypeptidase; penicillin-binding protein 5              | 31,61±7,97                   | 8,56±3,71                    | 119,83±9,85                  |
| 7m                   | Sulfate adenylate transferase (CysD)                                    | 86,53±8,56                   | 122,89±29,52                 | 256,30±20,58                 |

| Spot n. <sup>a</sup> | Annotation UniprotKB                                  | Spot level in A <sup>b</sup> | Spot level in B <sup>b</sup> | Spot level in P <sup>b</sup> |
|----------------------|-------------------------------------------------------|------------------------------|------------------------------|------------------------------|
| 9m                   | Protein involved in catabolism of external DNA        | 37,02±8,80                   | 0±0                          | 81,194±7,08                  |
| 11m                  | Outer-membrane lipoproteins carrier protein (LolA)    | 32,58±7,12                   | 0±0                          | 100,96±2,72                  |
| 4m                   | Putative peptide import ATP-binding protein BMEII0863 | 2,91±1,26                    | 71,96±16,72                  | 252,32±26,77                 |
| 10m                  | Xilose isomerase                                      | 92,20±11,77                  | 398,32±11,81                 | 209,5±11,99                  |
| 12m                  | Phospholipid-binding protein with LysM domain         | 1328,78±25,16                | 526,55±75,65                 | 2766,13±219,92               |
| 13m                  | Putative uncharacterized protein                      | 104,69±16,63                 | 344,20±45,61                 | 794,63±46,38                 |
| 14m                  | Mobilization protein                                  | 140,85±31,67                 | 0±0                          | 73,35±6,22                   |
